# Supplementary material for: V-doped Ni2P nanoparticle grafted g-C3N4 nanosheets for enhanced photocatalytic hydrogen evolution performance under visible light
Source: Royal Society of Chemistry journal article supplement (doi:10.1039/d3dt00996c), 2023-01-01
Supplement: d3dt00996c1.pdf [file d3dt00996c1.pdf]

**Supporting Information (SI):**

**V doping Ni<sub>2</sub>P nanoparticles grafted g-C<sub>3</sub>N<sub>4</sub> nanosheets for enhanced photocatalytic hydrogen evolution performance under visible-light**

Qian Chen<sup>a</sup>, Jianfeng Huang<sup>a,\*</sup>, Xiao Ting<sup>a</sup>, Liyun Cao<sup>a\*</sup>, Dinghan Liu<sup>b</sup>, Xiaoyi Li<sup>a</sup>,  
Mengfan Niu<sup>a</sup>, Guoting Xu<sup>a</sup>, Koji Kajiyoshi<sup>c</sup>, Liangliang Feng<sup>a,\*</sup>

<sup>a</sup> *School of Materials Science & Engineering, International S&T Cooperation Foundation of Shaanxi Province, Shaanxi University of Science and Technology, Xi'an 710021, China.*

<sup>b</sup> *School of Electronic Information and Artificial Intelligence, Shaanxi University of Science and Technology, Xi'an 710021, China.*

<sup>c</sup> *Kochi Key University, Research Laboratory of Hydrothermal Chemistry, Kochi 780-8520, Japan.*

\* Corresponding authors.

*E-mail addresses:* huangjf@sust.edu.cn (J. Huang), caoliyun@sust.edu.cn (L. Cao), fengll@sust.edu.cn (L. Feng).

Number of pages: 13

Number of figures: 10

Number of tables: 1

**Containing 20 pages, 17 Figures and 1 Tables**

**Additional images and data:**

**Figure S1.** XRD pattern of NiV-LDH and NiV-LDH/g-C<sub>3</sub>N<sub>4</sub>.

**Figure S2.** (a) N<sub>2</sub> adsorption–desorption isotherms at 77 K and (b) the corresponding pore size distribution curves of V-Ni<sub>2</sub>P/g-C<sub>3</sub>N<sub>4</sub>.

**Figure S3.** SEM images of (a) g-C<sub>3</sub>N<sub>4</sub>, (b) NiV-LDH, (c) V-Ni<sub>2</sub>P; TEM images of (d) g-C<sub>3</sub>N<sub>4</sub>.

**Figure S4.** TEM images of (a-b) NiV-LDH (2 μm), (c-d) V-Ni<sub>2</sub>P (50 nm).

**Figure S5.** SEM images of (a) V-Ni<sub>2</sub>P/g-C<sub>3</sub>N<sub>4</sub>, (b) Ni<sub>2</sub>P/g-C<sub>3</sub>N<sub>4</sub>.

**Figure S6.** TEM images of V-Ni<sub>2</sub>P/g-C<sub>3</sub>N<sub>4</sub>.

**Figure S7.** The banding energy of pure g-C<sub>3</sub>N<sub>4</sub> and 7.8 wt% V-Ni<sub>2</sub>P/g-C<sub>3</sub>N<sub>4</sub>.

**Figure S8.** (a) SEM and (b) TEM images of V-Ni<sub>2</sub>P/g-C<sub>3</sub>N<sub>4</sub> after tests.

**Figure S9.** The XPS spectra of (a) C 1s, (b) N 1s, (c) Ni 2p, (d) P 2p, (e) V 2p for V-Ni<sub>2</sub>P/g-C<sub>3</sub>N<sub>4</sub> after tests.

**Figure S10.** The valence band of 7.8 wt% V-Ni<sub>2</sub>P/g-C<sub>3</sub>N<sub>4</sub>.

**Table S1.** Summary of the Photocatalytic H<sub>2</sub> Evolution on g-C<sub>3</sub>N<sub>4</sub>-Based Photocatalysts.

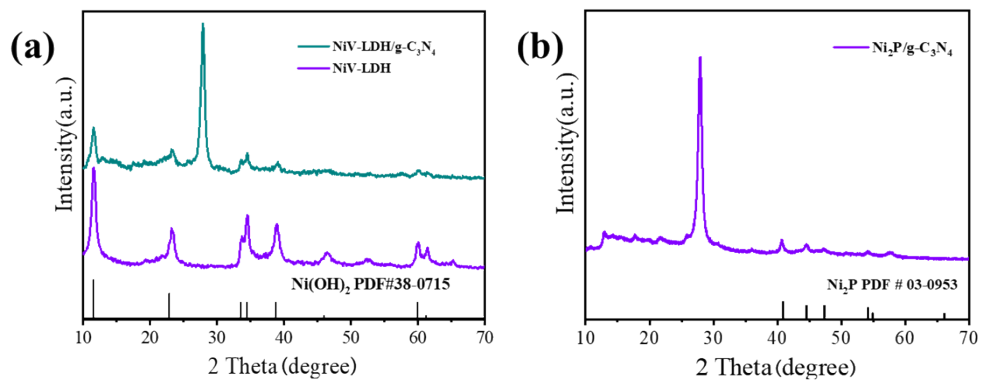

**Figure S1.** XRD pattern of (a) NiV-LDH and NiV-LDH/g-C<sub>3</sub>N<sub>4</sub>; (b) Ni<sub>2</sub>P/g-C<sub>3</sub>N<sub>4</sub>

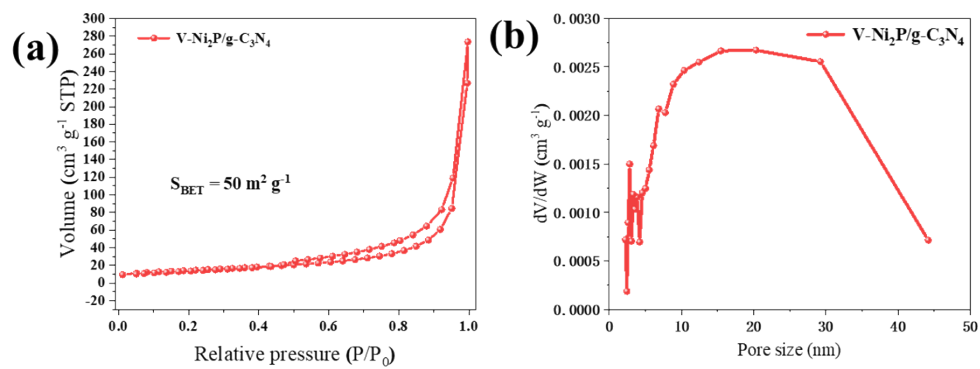

**Figure S2.** (a) N<sub>2</sub> adsorption–desorption isotherms at 77 K and (b) the corresponding pore size distribution curves of V-Ni<sub>2</sub>P/g-C<sub>3</sub>N<sub>4</sub>.

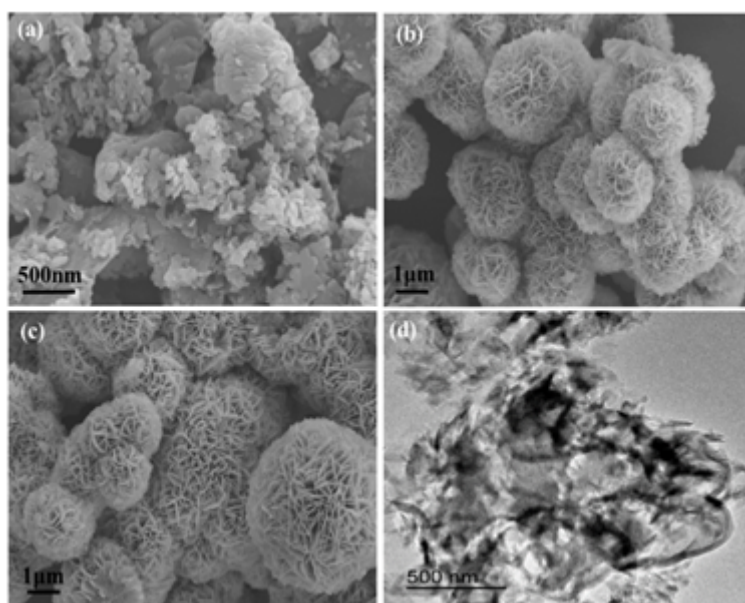

**Figure S3.** SEM images of (a)  $g\text{-C}_3\text{N}_4$ , (b) NiV-LDH, (c) V-Ni<sub>2</sub>P; TEM images of (d)  $g\text{-C}_3\text{N}_4$ .

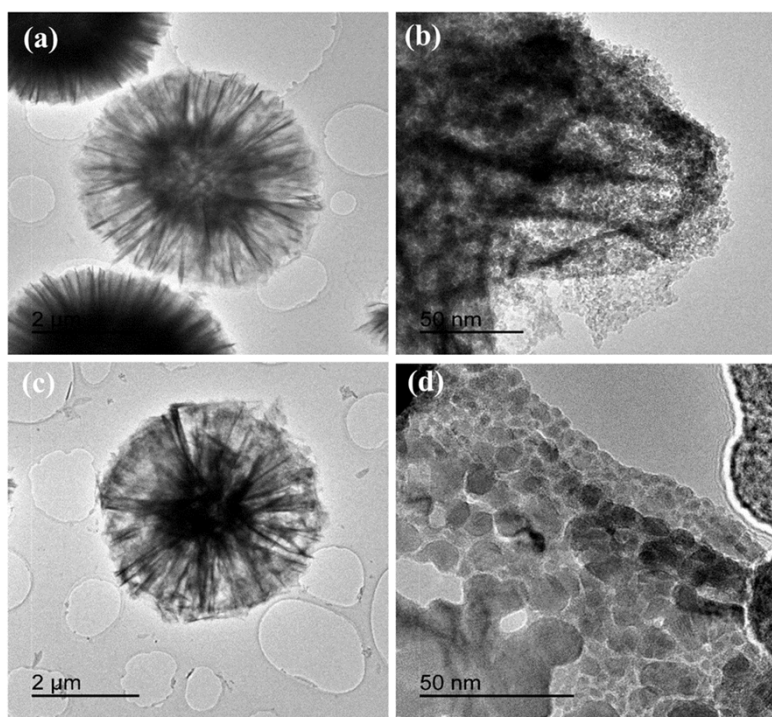

**Figure S4.** TEM images of (a-b) NiV-LDH (2 μm), (c-d) V-Ni<sub>2</sub>P (50 nm).

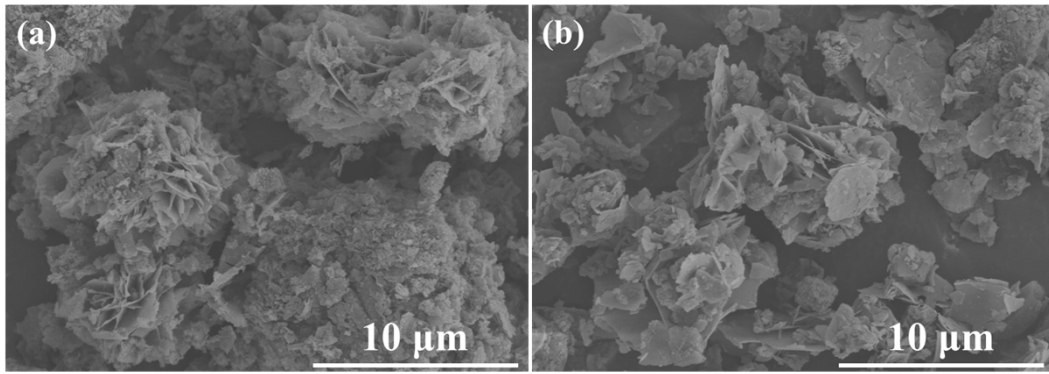

**Figure S5.** SEM images of (a) V-Ni<sub>2</sub>P/g-C<sub>3</sub>N<sub>4</sub>, (b) Ni<sub>2</sub>P/g-C<sub>3</sub>N<sub>4</sub>.

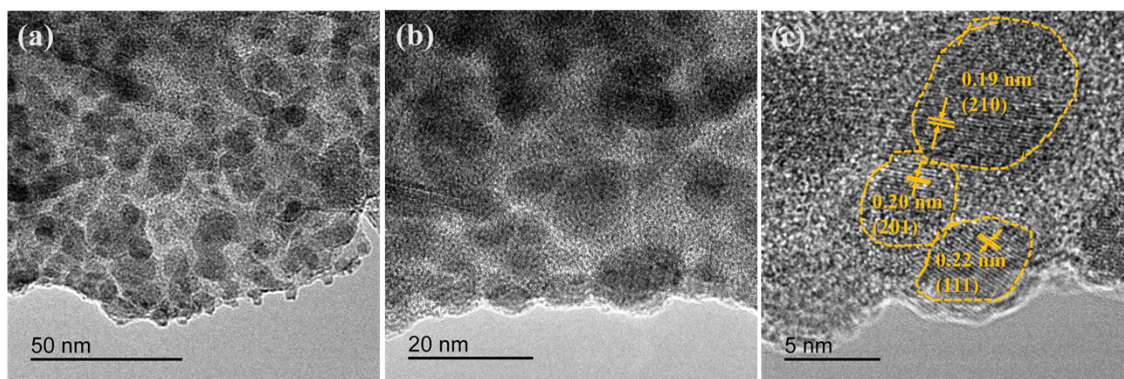

**Figure S6.** TEM images of V-Ni<sub>2</sub>P/g-C<sub>3</sub>N<sub>4</sub>.



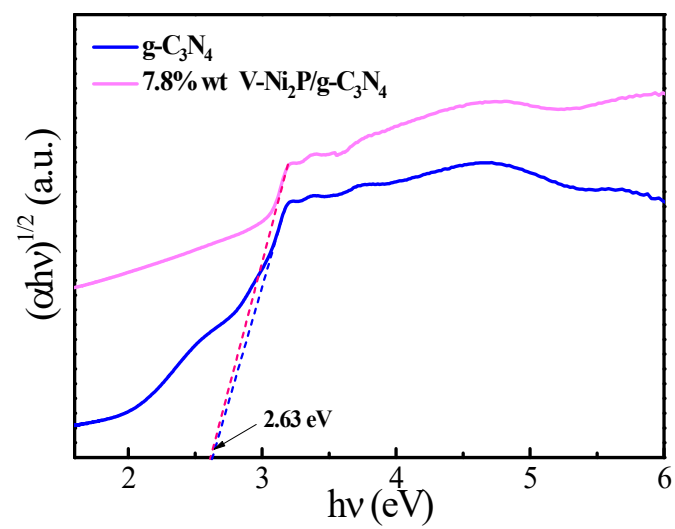

**Figure S7.** The banding energy of pure  $g\text{-C}_3\text{N}_4$  and 7.8 wt%  $\text{V-Ni}_2\text{P/g-C}_3\text{N}_4$ .

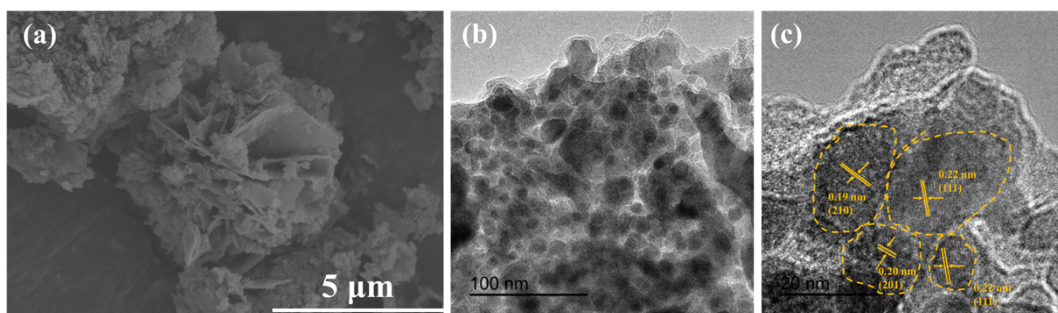

**Figure S8.** (a) SEM and (b) TEM images of V-Ni<sub>2</sub>P/g-C<sub>3</sub>N<sub>4</sub> after tests.

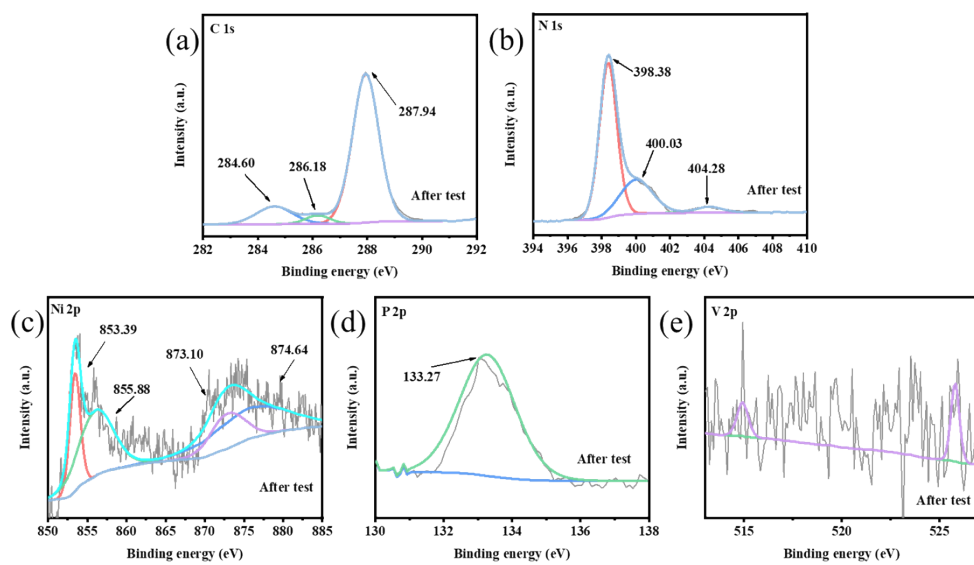

**Figure S9.** The XPS spectra of (a) C 1s, (b) N 1s, (c) Ni 2p, (d) P 2p, (e) V 2p for V-Ni<sub>2</sub>P/g-C<sub>3</sub>N<sub>4</sub> after tests.

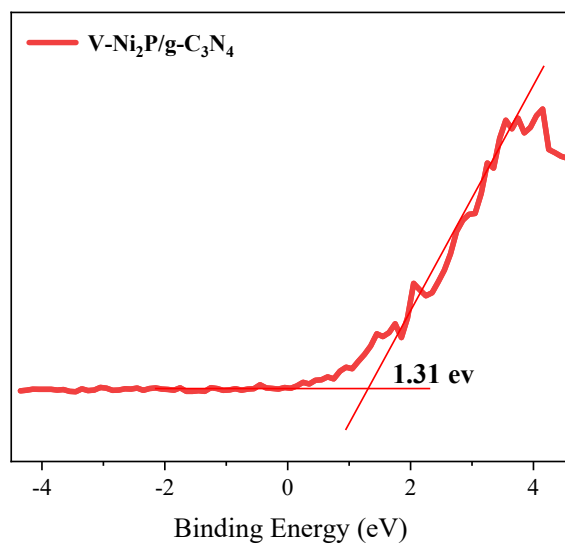

**Figure S10.** The valence band of pure g-C<sub>3</sub>N<sub>4</sub> and 7.8 wt% V-Ni<sub>2</sub>P/g-C<sub>3</sub>N<sub>4</sub>.

**Table S1.** Summary of the Photocatalytic H<sub>2</sub> Evolution on g-C<sub>3</sub>N<sub>4</sub>-Based Photocatalysts

| Photocatalysts | Co-catalysts                        | Power (Xe lamp),<br>wavelength  | Activity<br>$\mu\text{mol h}^{-1} \text{g}^{-1}$ | Reference    |                  |
|----------------|-------------------------------------|---------------------------------|--------------------------------------------------|--------------|------------------|
| <b>1</b>       | <b>g-C<sub>3</sub>N<sub>4</sub></b> | <b>V-Ni<sub>2</sub>P</b>        | <b>300 W, <math>\lambda &gt; 420</math> nm</b>   | <b>271.5</b> | <b>This work</b> |
| 2              | g-C <sub>3</sub> N <sub>4</sub>     | Co <sub>2</sub> P               | 300 W, $\lambda > 420$ nm                        | 128.4        | 30               |
| 3              | g-C <sub>3</sub> N <sub>4</sub>     | FeP                             | 300 W, $\lambda > 420$ nm                        | 177.9        | 33               |
| 4              | g-C <sub>3</sub> N <sub>4</sub>     | MoP                             | 300 W, $\lambda > 420$ nm                        | 327.5        | 39               |
| 5              | g-C <sub>3</sub> N <sub>4</sub>     | Mo-Mo <sub>2</sub> P            | 300 W, $\lambda > 420$ nm                        | 219.7        | 55               |
| 6              | g-C <sub>3</sub> N <sub>4</sub>     | CQDs, Pt                        | 400 W, $\lambda > 420$ nm                        | 116.1        | 68               |
| 7              | g-C <sub>3</sub> N <sub>4</sub>     | Ni <sub>12</sub> P <sub>5</sub> | 350 W, $\lambda > 400$ nm                        | 126.6        | 69               |
| 8              | g-C <sub>3</sub> N <sub>4</sub>     | Ni                              | 500 W                                            | 168.2        | 70               |
| 9              | g-C <sub>3</sub> N <sub>4</sub>     | NiS                             | 150 W, $\lambda > 400$ nm                        | 84           | 71               |
